# Supplementary material for: Genome-wide genetic links between amyotrophic lateral sclerosis and autoimmune diseases
Source: Springer Nature journal article supplement (doi:10.1186/s12916-021-01903-y), 2021-02-05
Supplement: MOESM1 [file 18836508]

## Additional file 1: supplementary figures and tables

**Table S1. Summary data from all GWAS used in current study**

| <b>Disease</b>                | <b>Abbreviation</b> | <b>Cases</b> | <b>Controls</b> | <b>Ethnics</b> | <b>SNPs</b> | <b>Reference</b> |
|-------------------------------|---------------------|--------------|-----------------|----------------|-------------|------------------|
| Amyotrophic lateral sclerosis | ALS                 | 20,806       | 59,804          | EUR            | 10,031,417  | 17               |
| Amyotrophic lateral sclerosis | ALS replication     | 14,387       | 27,008          | EUR & EAS      | 6,613,543   | 26               |
| asthma                        | asthma              | 10,549       | 47,146          | EUR            | 33,771,858  | 18               |
| Celiac disease                | CeD                 | 4,533        | 10,750          | EUR            | 523,398     | 24               |
| Crohn's disease               | CD                  | 12,194       | 28,072          | EUR            | 9,570,787   | 25               |
| inflammatory bowel disease    | IBD                 | 25,042       | 34,915          | EUR            | 7,345,446   | 25               |
| multiple sclerosis            | MS                  | 33,647       | 449,056         | EUR            | 17,510,617  | 19               |
| psoriasis                     | psoriasis           | 17,008       | 37,154          | EUR            | 7,055,881   | 20               |
| rheumatoid arthritis          | RA                  | 29,880       | 73,758          | EUR & EAS      | 9,739,303   | 21               |
| systemic lupus erythematosus  | SLE                 | 7,219        | 15,991          | EUR            | 7,915,251   | 22               |
| type 1 diabetes               | T1D                 | 9,934        | 16,956          | EUR            | 2,060,920   | 23               |
| ulcerative colitis            | UC                  | 12,366       | 33,609          | EUR            | 9,588,016   | 25               |
| Parkinson's disease           | PD                  | 33,674       | 449,056         | EUR            | 17,510,617  | 36               |
| Alzheimer's disease           | AD                  | 17,008       | 37,154          | EUR            | 7,055,881   | 37               |

EUR, European; EAS, East Asian; SNP, single nucleotide polymorphism; GWAS, genome-wide association study; 23andMe contributions were excluded in the PD GWAS, as described in the original publication.

**Table S2. Genetic correlation between AD, ALS, PD and autoimmune disorders**

|           | <b>AD</b>    | <b>ALS</b>              | <b>PD</b>               |
|-----------|--------------|-------------------------|-------------------------|
| asthma    | 0.04 (0.45)  | 0.08 (0.23)             | -0.10 (0.01)            |
| CeD       | -0.03 (0.54) | <b>0.58 (5.82E-28)</b>  | 0.05 (0.24)             |
| CD        | -0.02 (0.48) | <b>-0.25 (2.75E-10)</b> | 0.00 (0.88)             |
| IBD       | -0.02 (0.55) | <b>-0.33 (1.16E-16)</b> | -0.02 (0.41)            |
| MS        | 0.05 (0.18)  | <b>0.23 (1.11E-08)</b>  | 0.02 (0.62)             |
| psoriasis | 0.07 (0.29)  | -2.86E-03 (0.97)        | -0.02 (0.82)            |
| RA        | 0.03 (0.53)  | <b>0.22 (6.17E-07)</b>  | <b>-0.10 (3.31E-03)</b> |
| SLE       | 0.03 (0.36)  | <b>0.26 (6.58E-07)</b>  | 0.04 (0.26)             |
| UC        | -0.01 (0.68) | <b>-0.32 (1.96E-13)</b> | -0.06 (0.09)            |

Values are presented as genetic correlation (P value). Values in bold denote significant correlation.

Genetic correlation for T1D was not estimated since beta value was not available in the original GWAS.

**Table S3. Risk loci associated with ALS conditional on autoimmune diseases**

| <b>SNP</b>  | <b>Genomic position<br/>(GRCh37)</b> | <b>Closest gene</b> | <b>FDR value</b> | <b>Original<br/>ALS P value</b> | <b>Replication<br/>ALS P value</b> |
|-------------|--------------------------------------|---------------------|------------------|---------------------------------|------------------------------------|
| rs72714928  | 1:161207232                          | <i>NR1I3</i>        | 5.20E-03         | 2.12E-06                        | 4.29E-04                           |
| rs1004197   | 1:94249540                           | <i>BCAR3</i>        | 3.36E-03         | 1.22E-06                        | 2.83E-02                           |
| rs61527579  | 2:76237892                           | <i>GCFC2</i>        | 5.27E-03         | 2.67E-06                        | 1.22E-03                           |
| rs3828599   | 5:150401796                          | <i>GPX3</i>         | 3.26E-05         | 8.08E-08                        | 1.22E-07                           |
| rs10463311  | 5:150410835                          | <i>TNIP1</i>        | 1.72E-04         | 4.00E-08                        | 1.32E-08                           |
| rs538622    | 5:172347679                          | <i>ERGIC1</i>       | 2.00E-03         | 6.69E-07                        | 1.22E-04                           |
| rs7805982   | 7:42429859                           | <i>GLI3</i>         | 6.56E-03         | 2.86E-06                        | 2.35E-04                           |
| rs17070492  | 8:2420855                            | <i>LOC101927815</i> | 5.33E-04         | 1.04E-07                        | 3.27E-07                           |
| rs9969832   | 9:27493063                           | <i>MOB3B</i>        | 3.39E-24         | 2.01E-28                        | 5.03E-21                           |
| rs2484319   | 9:27563755                           | <i>C9orf72</i>      | 1.86E-24         | 1.27E-29                        | 5.74E-23                           |
| rs11195948  | 10:114163515                         | <i>ACSL5</i>        | 2.26E-03         | 9.14E-07                        | 4.04E-05                           |
| rs61880881  | 11:22270782                          | <i>ANO5</i>         | 2.25E-03         | 2.73E-06                        | n.a.                               |
| rs653178    | 12:112007756                         | <i>ATXN2</i>        | 6.73E-03         | 5.18E-04                        | n.a.                               |
| rs118082508 | 12:57318819                          | <i>SDR9C7</i>       | 1.60E-04         | 1.97E-08                        | n.a.                               |
| rs113247976 | 12:57975700                          | <i>KIF5A</i>        | 2.60E-06         | 6.43E-10                        | n.a.                               |
| rs12320537  | 12:58021091                          | <i>B4GALNT1</i>     | 5.74E-03         | 6.97E-06                        | 7.59E-02                           |
| rs116900480 | 12:58656105                          | <i>LINC02403</i>    | 5.34E-06         | 6.60E-10                        | n.a.                               |
| rs12308116  | 12:64710719                          | <i>C12orf56</i>     | 6.50E-03         | 4.32E-06                        | 6.11E-07                           |
| rs41292019  | 12:64849716                          | <i>TBK1</i>         | 8.12E-05         | 8.39E-09                        | n.a.                               |
| rs447614    | 14:31080799                          | <i>G2E3</i>         | 1.24E-03         | 1.74E-07                        | 3.96E-07                           |
| rs1950882   | 14:31172253                          | <i>SCFD1</i>        | 1.22E-03         | 1.69E-07                        | 7.69E-07                           |
| rs2295172   | 14:92492651                          | <i>TRIP11</i>       | 2.65E-03         | 8.91E-07                        | 1.38E-04                           |
| rs1107115   | 14:92546544                          | <i>ATXN3</i>        | 1.93E-03         | 6.47E-07                        | 4.38E-05                           |
| rs62029863  | 16:50749408                          | <i>NOD2</i>         | 7.12E-04         | 7.91E-05                        | n.a.                               |
| rs34517613  | 17:26610252                          | <i>KRT18P55</i>     | 5.31E-03         | 2.18E-06                        | n.a.                               |
| rs35714695  | 17:26719788                          | <i>SARM1</i>        | 8.25E-03         | 2.89E-06                        | 3.07E-10                           |
| rs2285642   | 17:34912744                          | <i>GGNBP2</i>       | 4.52E-03         | 1.80E-06                        | 1.18E-06                           |
| rs12608932  | 19:17752689                          | <i>UNC13A</i>       | 3.86E-11         | 6.35E-15                        | 2.70E-10                           |
| rs56185963  | 20:48514826                          | <i>SLC9A8</i>       | 8.34E-03         | 8.96E-06                        | 4.53E-04                           |
| rs112572132 | 20:48533630                          | <i>LOC105372653</i> | 5.35E-03         | 6.50E-06                        | 4.40E-04                           |
| rs75087725  | 21:45753117                          | <i>CFAP410</i>      | 2.17E-10         | 1.85E-14                        | n.a.                               |
| rs62241220  | 22:50747507                          | <i>DENND6B</i>      | 7.37E-03         | 7.45E-06                        | n.a.                               |

n.a., not available; SNP, single nucleotide polymorphism; FDR, false discovery rate.

**Table S4. eQTL revealing functional effects of shared risk SNPs in tissues from GTEx**

| <b>Gene</b>    | <b>Tissue</b>                         | <b>Genomic position<br/>(GRCh37)</b> | <b>SNP</b>  | <b>Nominal P<br/>value</b> |
|----------------|---------------------------------------|--------------------------------------|-------------|----------------------------|
| <i>ATXN3</i>   | Brain_Cerebellum                      | 14:92495536                          | rs2896190   | 2.14E-08                   |
| <i>ATXN3</i>   | Muscle_Skeletal                       | 14:92541852                          | rs7152876   | 1.25E-10                   |
| <i>C9orf72</i> | Brain_Nucleus_accumbens_basal_ganglia | 9:27559835                           | rs774357    | 2.71E-08                   |
| <i>C9orf72</i> | Brain_Spinal_cord_cervical_c-1        | 9:27516640                           | rs774351    | 7.62E-07                   |
| <i>C9orf72</i> | Muscle_Skeletal                       | 9:27516640                           | rs774351    | 7.63E-08                   |
| <i>DENND6B</i> | Brain_Cortex                          | 22:50748930                          | rs68069258  | 5.06E-10                   |
| <i>DENND6B</i> | Brain_Frontal_Cortex_BA9              | 22:50742935                          | rs34544325  | 8.60E-10                   |
| <i>DENND6B</i> | Whole_Blood                           | 22:50742611                          | rs62241211  | 3.33E-08                   |
| <i>DHRS11</i>  | Brain_Cerebellum                      | 17:34951204                          | rs2285640   | 2.54E-07                   |
| <i>DHRS11</i>  | Brain_Cortex                          | 17:34937221                          | rs9903355   | 1.31E-09                   |
| <i>DHRS11</i>  | Brain_Frontal_Cortex_BA9              | 17:34937221                          | rs9903355   | 8.11E-07                   |
| <i>DHRS11</i>  | Brain_Nucleus_accumbens_basal_ganglia | 17:34951204                          | rs2285640   | 9.76E-09                   |
| <i>DHRS11</i>  | Muscle_Skeletal                       | 17:34951204                          | rs2285640   | 2.74E-10                   |
| <i>GGNBP2</i>  | Brain_Caudate_basal_ganglia           | 17:34937221                          | rs9903355   | 7.94E-08                   |
| <i>GGNBP2</i>  | Muscle_Skeletal                       | 17:34951204                          | rs2285640   | 3.60E-14                   |
| <i>GGNBP2</i>  | Whole_Blood                           | 17:34951204                          | rs2285640   | 5.64E-11                   |
| <i>MYO19</i>   | Muscle_Skeletal                       | 17:34951204                          | rs2285640   | 1.64E-21                   |
| <i>MYO19</i>   | Whole_Blood                           | 17:34951204                          | rs2285640   | 7.15E-09                   |
| <i>NOD2</i>    | Whole_Blood                           | 16:50730229                          | rs2066850   | 7.84E-11                   |
| <i>PLXNB2</i>  | Muscle_Skeletal                       | 22:50742935                          | rs34544325  | 5.05E-21                   |
| <i>PPP6R2</i>  | Muscle_Skeletal                       | 22:50747507                          | rs62241220  | 9.39E-16                   |
| <i>SCFD1</i>   | Brain_Anterior_cingulate_cortex_BA24  | 14:31183168                          | rs6571361   | 2.03E-07                   |
| <i>SCFD1</i>   | Brain_Cerebellar_Hemisphere           | 14:31059969                          | rs7154847   | 2.52E-08                   |
| <i>SCFD1</i>   | Brain_Cerebellum                      | 14:31183168                          | rs6571361   | 1.25E-12                   |
| <i>SCFD1</i>   | Muscle_Skeletal                       | 14:31080800                          | rs447853    | 1.70E-11                   |
| <i>SCFD1</i>   | Whole_Blood                           | 14:31183168                          | rs6571361   | 2.36E-25                   |
| <i>SLC9A8</i>  | Brain_Cerebellar_Hemisphere           | 20:48578734                          | rs113558364 | 1.36E-10                   |
| <i>SLC9A8</i>  | Brain_Cerebellum                      | 20:48561156                          | rs4810992   | 3.10E-08                   |
| <i>SLC9A8</i>  | Muscle_Skeletal                       | 20:48561156                          | rs4810992   | 9.97E-13                   |
| <i>TMEM116</i> | Whole_Blood                           | 12:111989979                         | rs848132    | 4.42E-07                   |
| <i>TRIP11</i>  | Brain_Cerebellum                      | 14:92496613                          | rs4556729   | 4.48E-07                   |
| <i>TRIP11</i>  | Muscle_Skeletal                       | 14:92497990                          | rs10138217  | 3.96E-18                   |
| <i>ZNHIT3</i>  | Whole_Blood                           | 17:34937221                          | rs9903355   | 8.23E-15                   |

cis-eQTL with the most significant nominal P value for each gene in target tissues were listed

**Table S5. Functional annotation of shared risk genes**

| <b>GO ID</b> |                                   | <b>P value</b> | <b>FDR adjusted P value</b> |
|--------------|-----------------------------------|----------------|-----------------------------|
| GO:0097517   | contractile actin filament bundle | 1.26E-03       | 0.00378                     |
| GO:0032432   | actin filament bundle             | 1.57E-03       | 0.0127                      |
| GO:0005801   | cis-Golgi network                 | 1.61E-03       | 0.0127                      |
| GO:0042641   | actomyosin                        | 1.81E-03       | 0.0127                      |
| GO:0047485   | protein N-terminus binding        | 3.94E-03       | 0.0473                      |
| GO:0015629   | actin cytoskeleton                | 8.58E-03       | 0.0129                      |

GO, Gene Ontology; FDR, false discovery rate.

**Figure S1. Manhattan-style plots showing the estimates of local genetic correlation between ALS and autoimmune disorders**

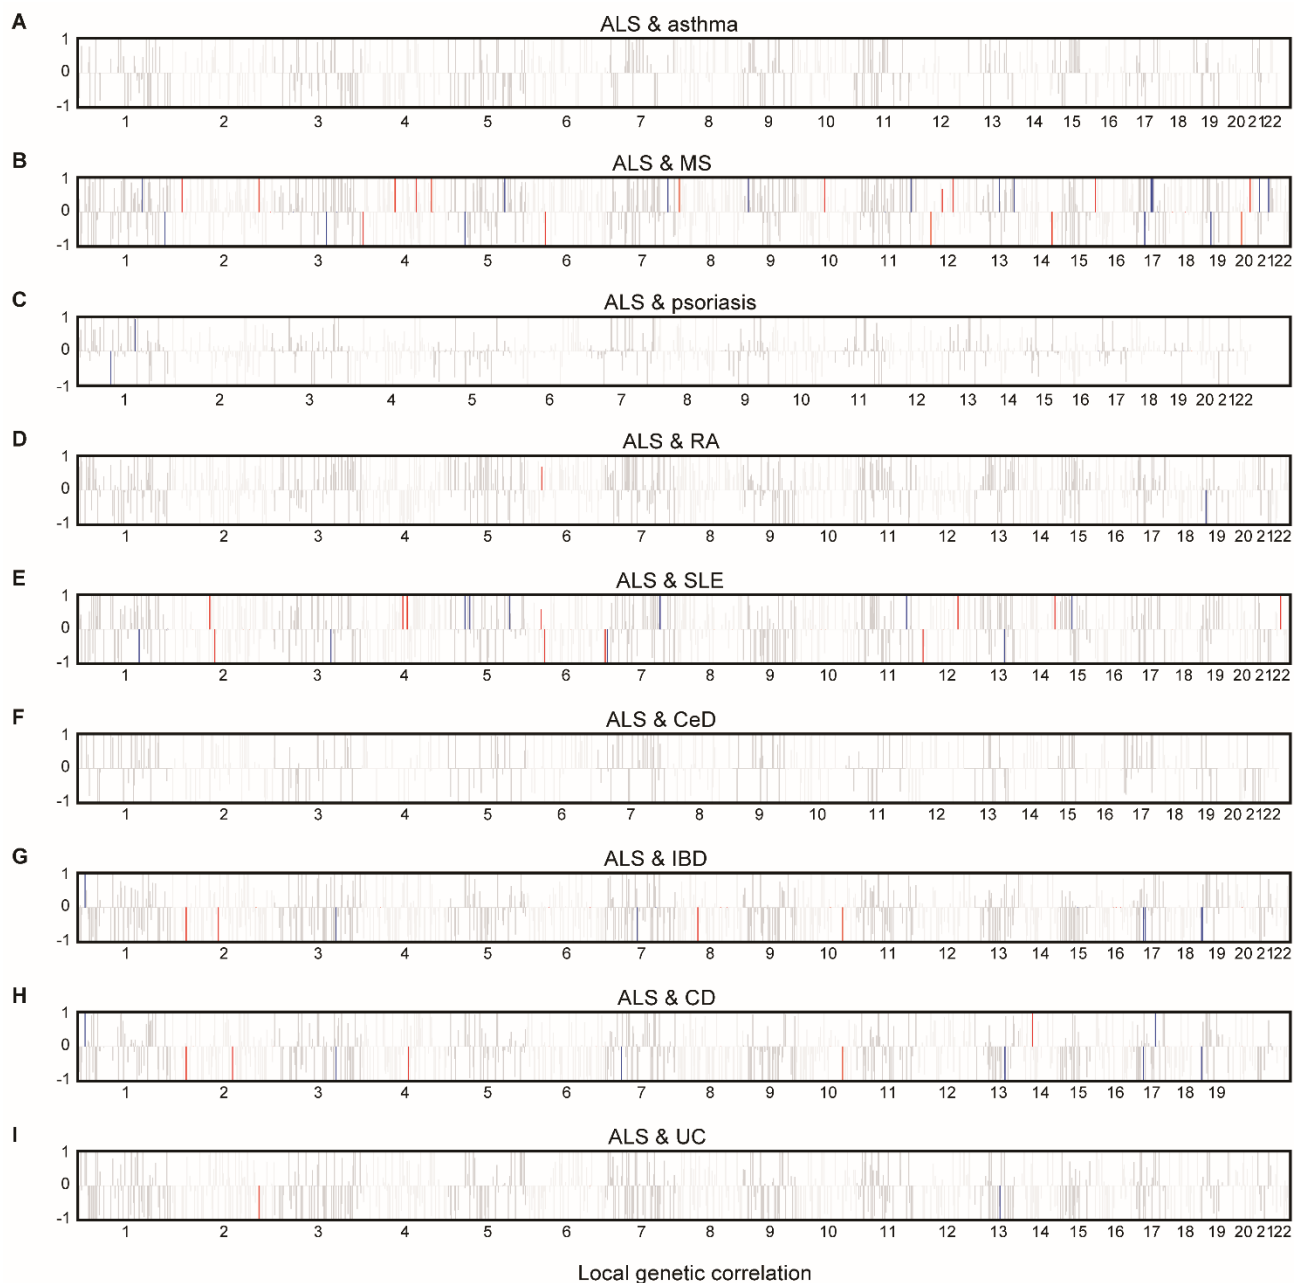

No regions with significant local genetic correlation were identified after Bonferroni correction. Regions with nominally significant correlation ( $P < 0.05$ ) were shown as blue (odd chromosome) and red (even chromosome) lines. Y axis denotes the genetic correlation. Plots were generated using  $\rho$ -HESS with default parameters. The figure is suggested to view online for higher resolution.

**Figure S2. Conditional Manhattan plots showing risk loci for ALS conditional on each autoimmune disease**

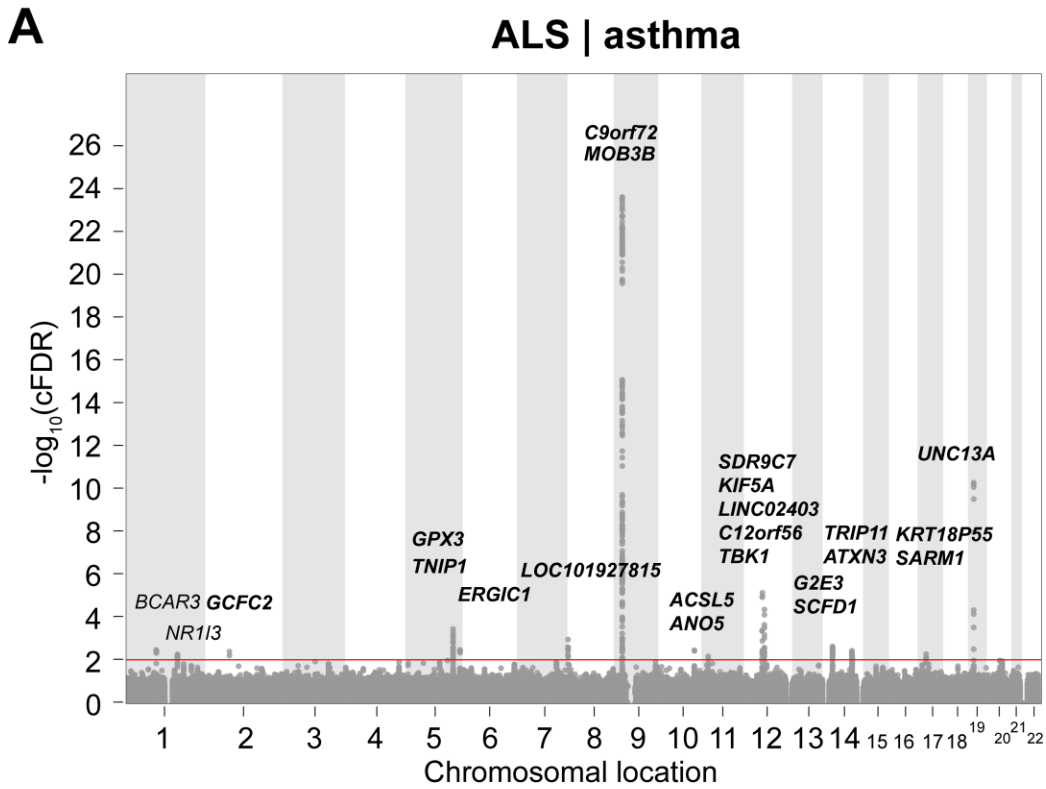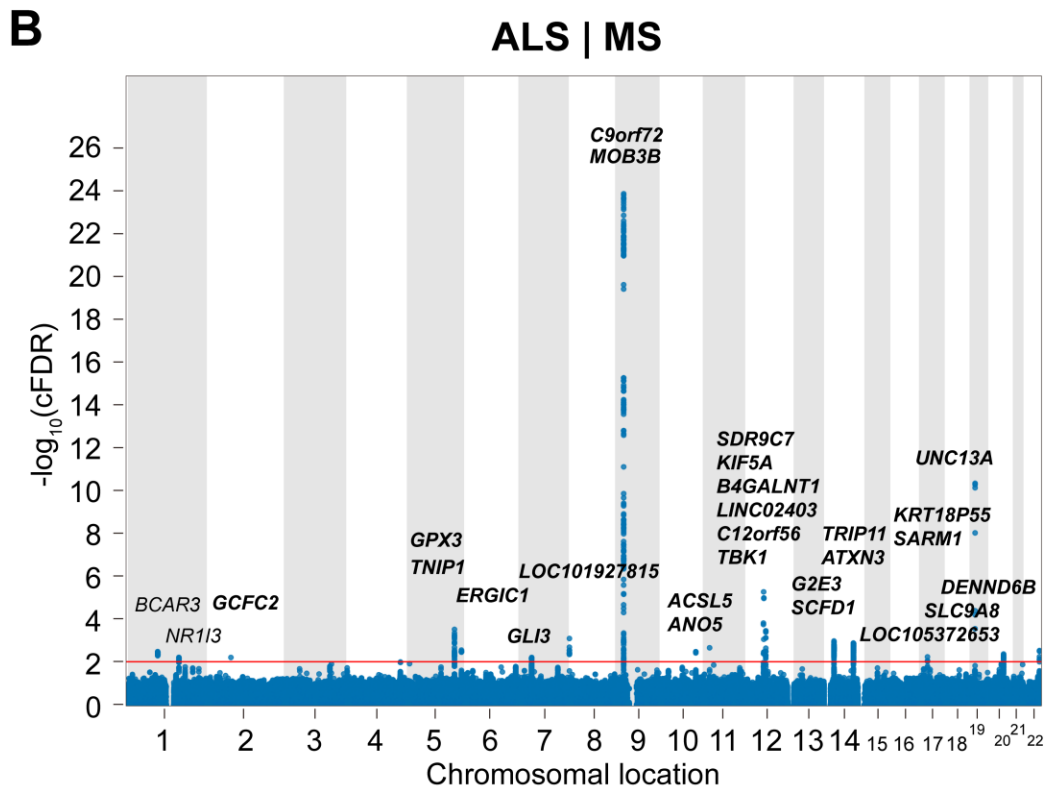

**C****ALS | psoriasis**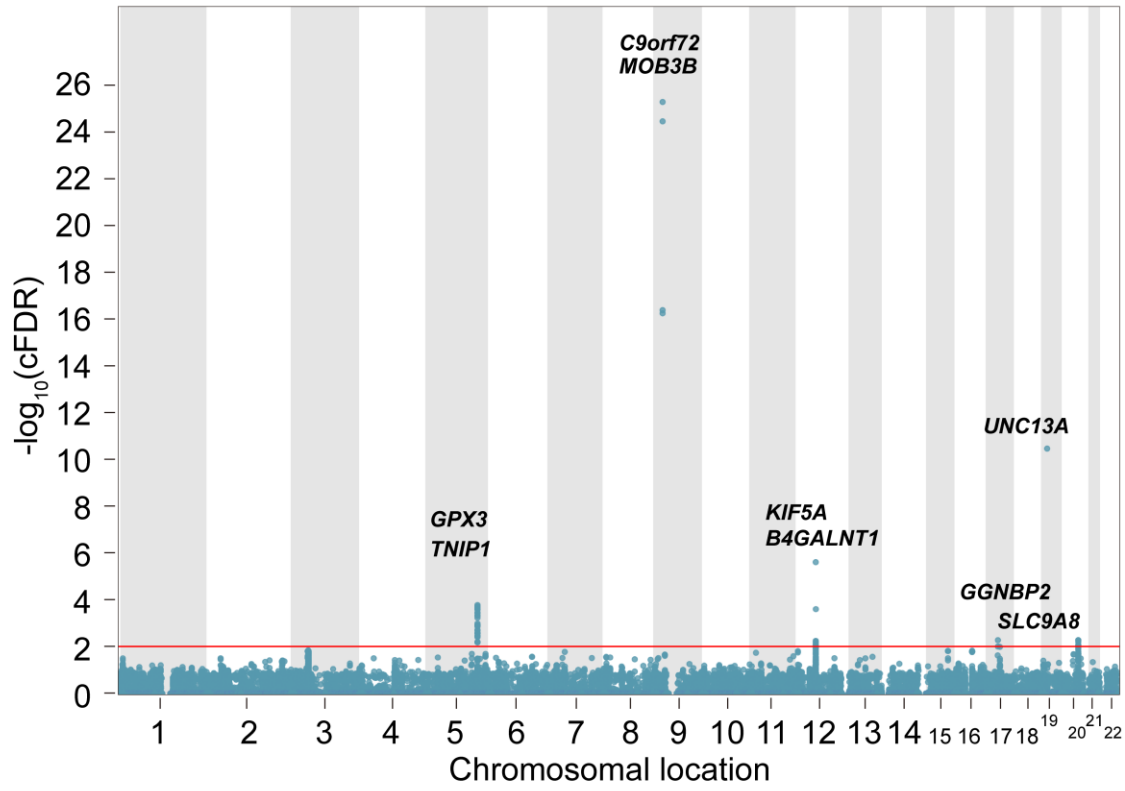**D****ALS | RA**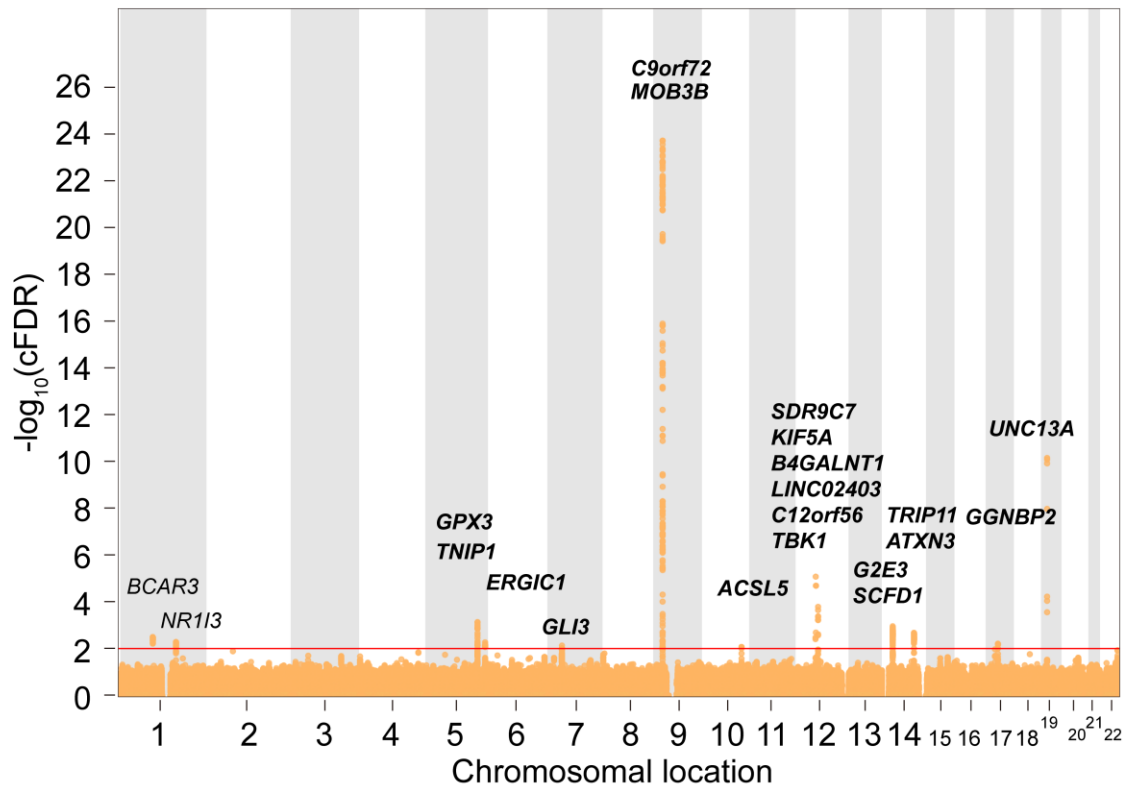



**E****ALS | SLE**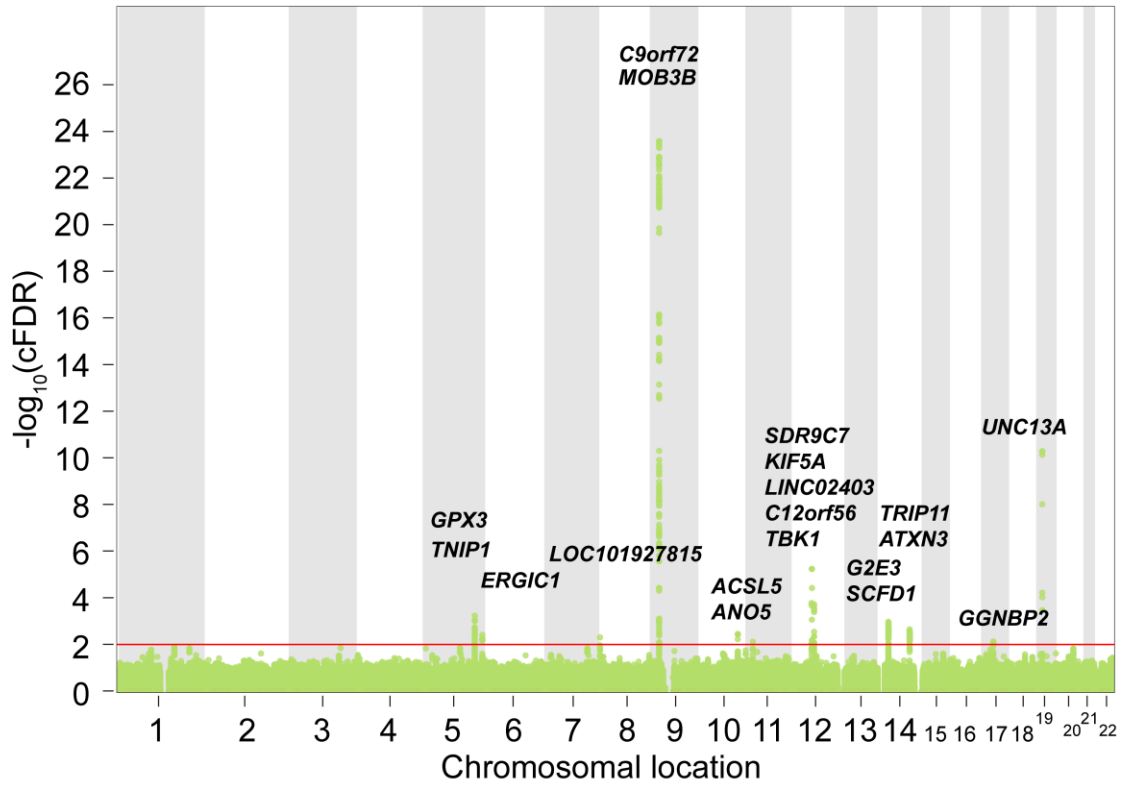**F****ALS | T1D**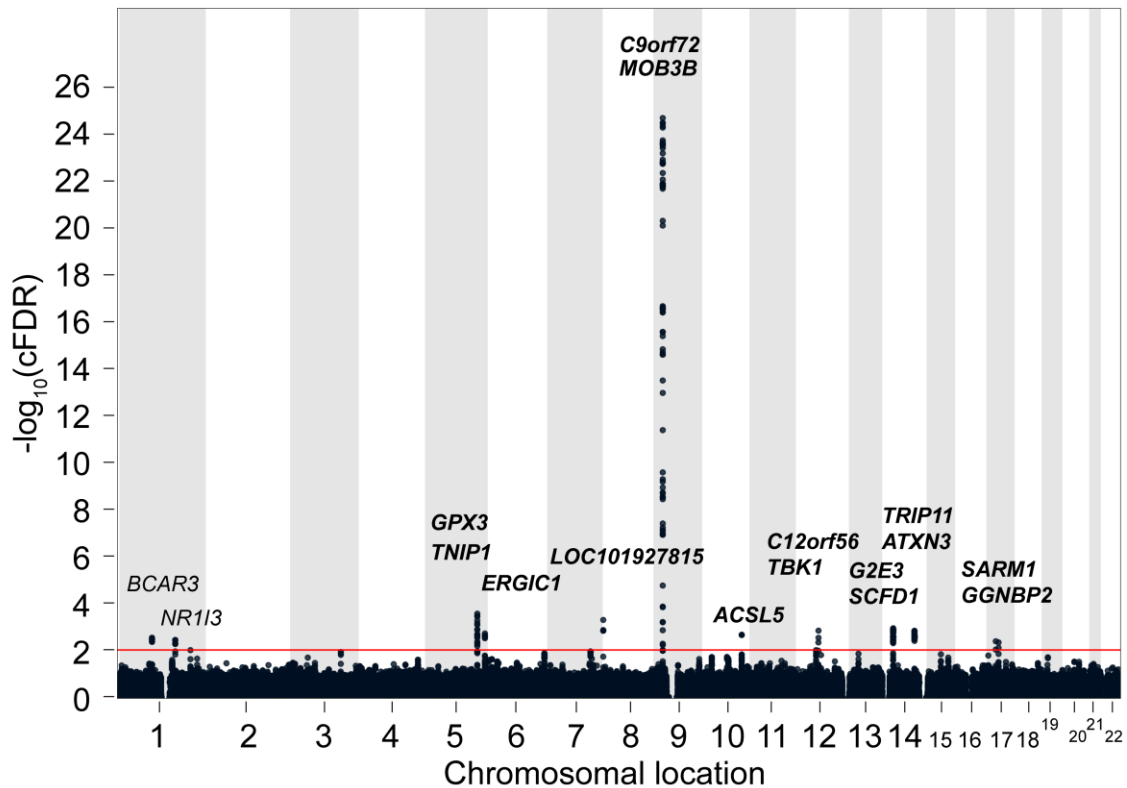

**G****ALS | CeD**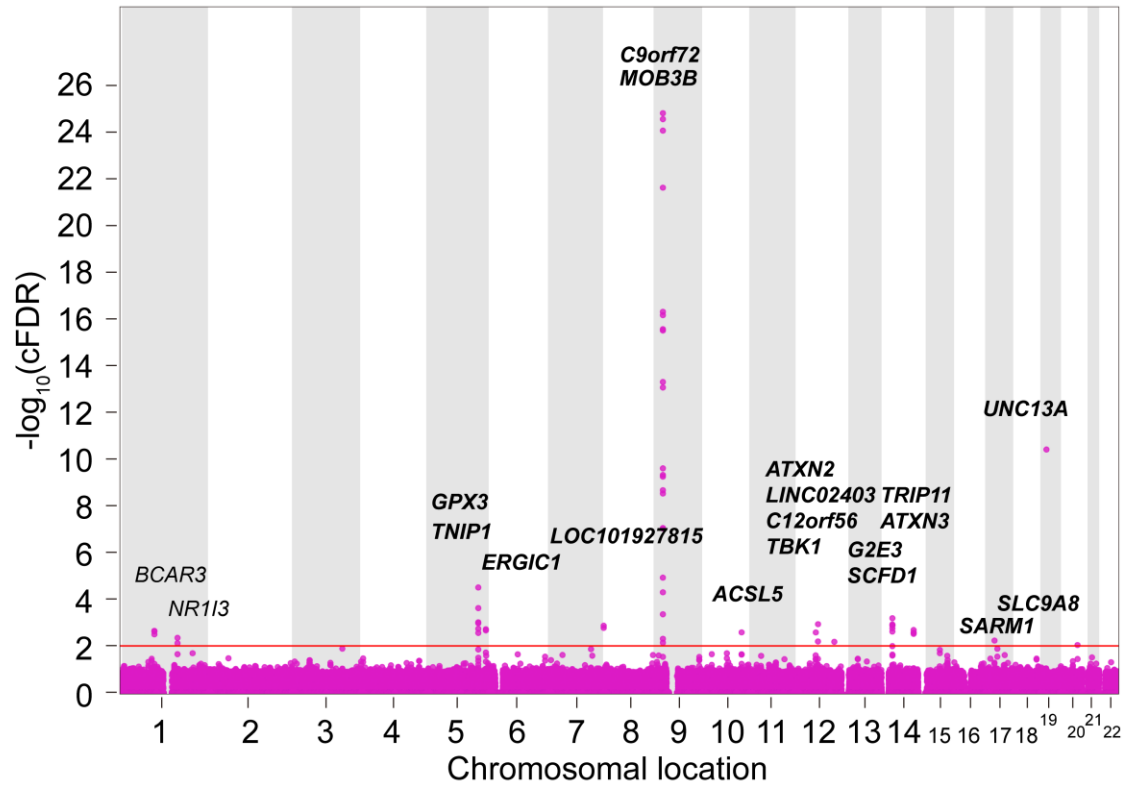**H****ALS | IBD**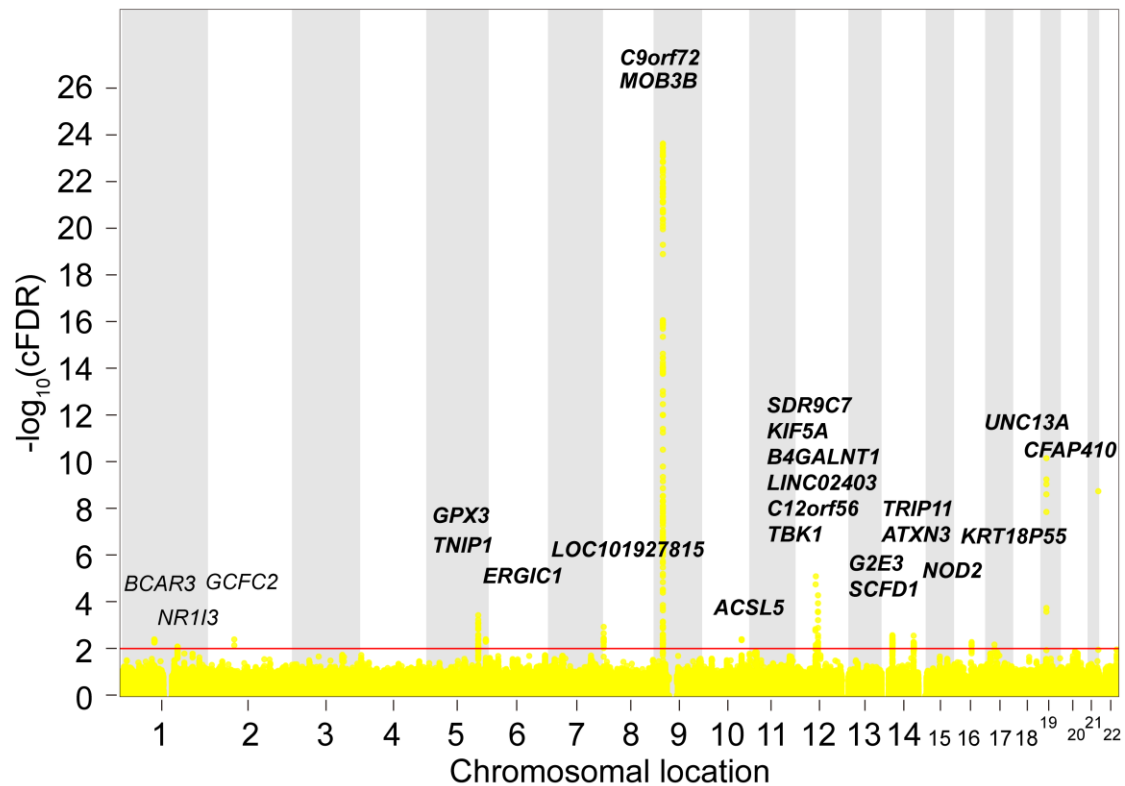

**I****ALS | CD**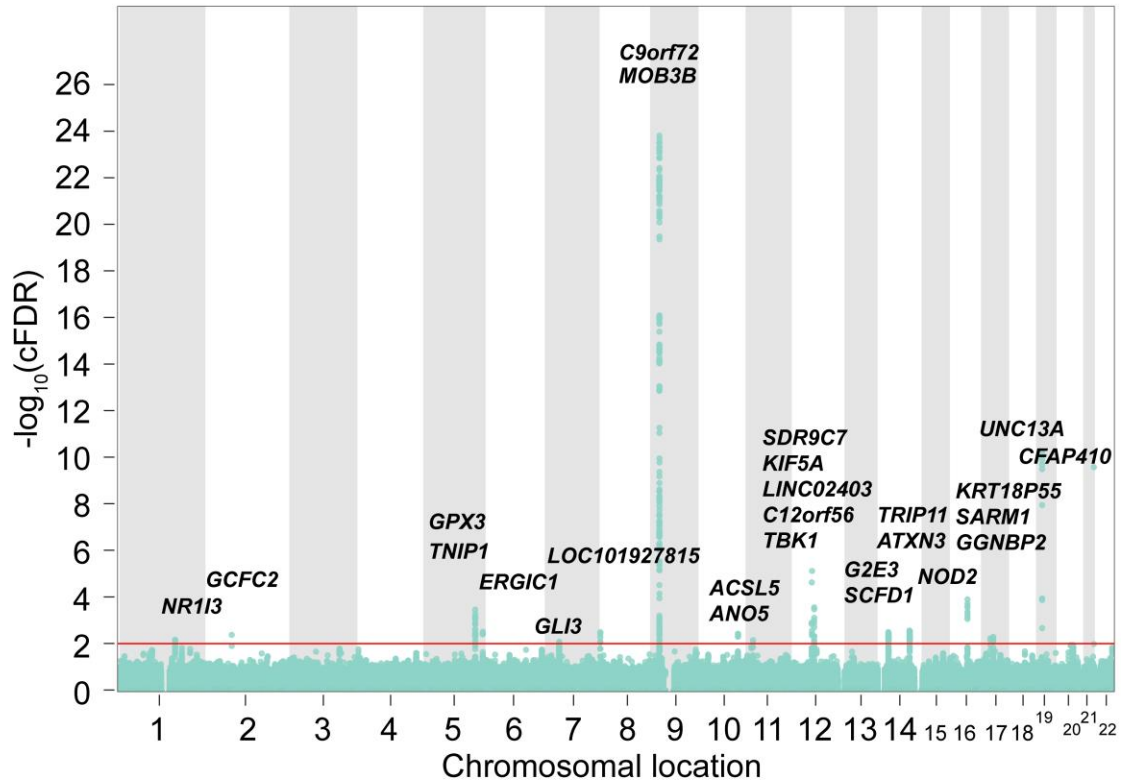**J****ALS | UC**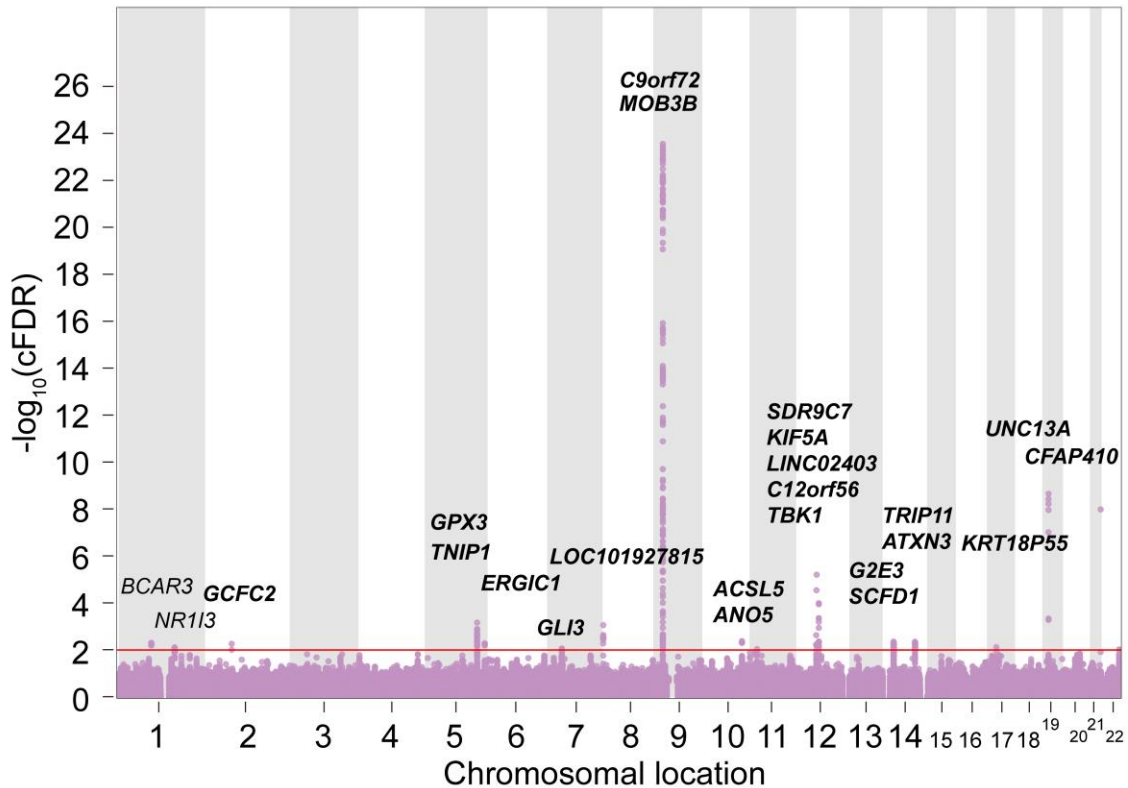

**K****Merge**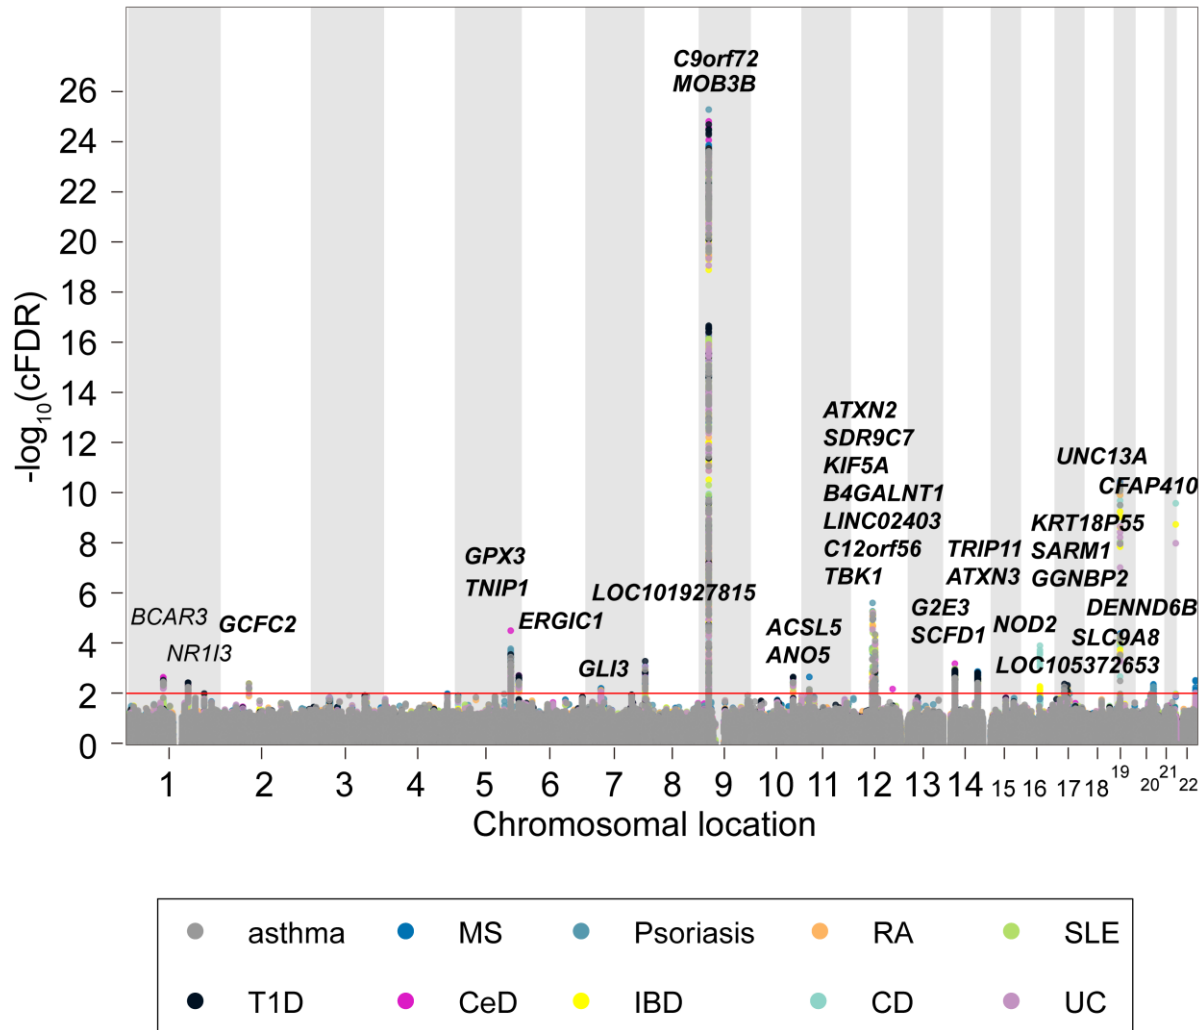

The horizontal line represents the significant threshold (conditional FDR < 0.01). The figure is suggested to view online for higher resolution.

**Figure S3. Regional association plots for shared risk loci between ALS and each autoimmune disease**

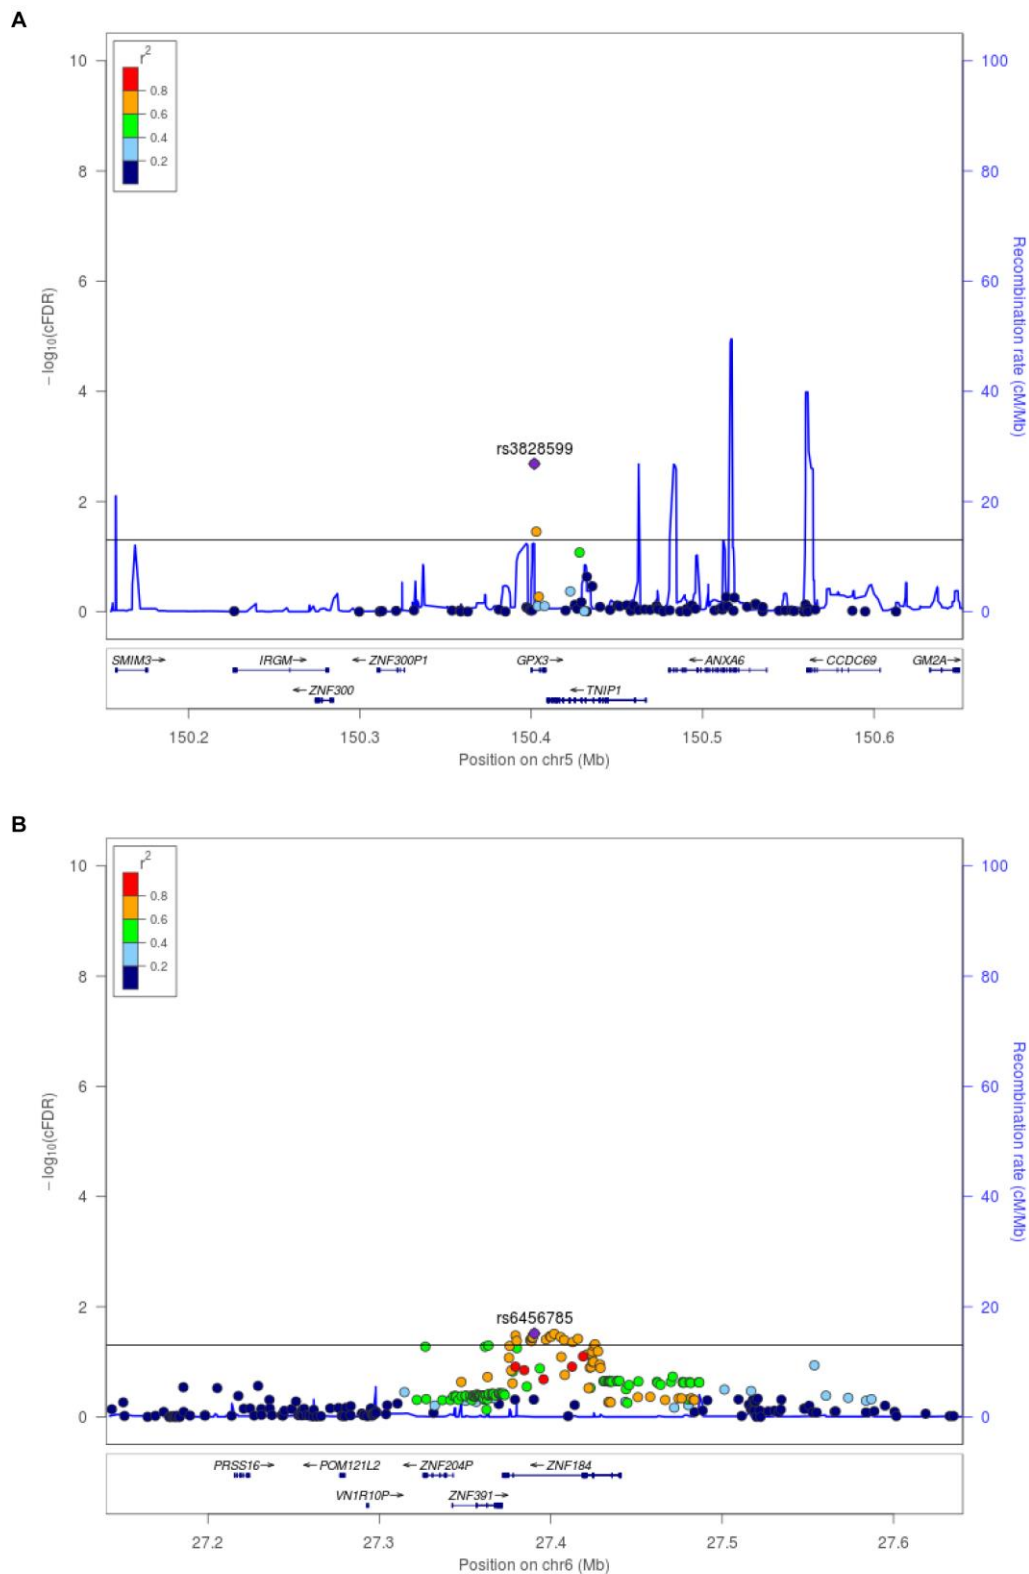

**C**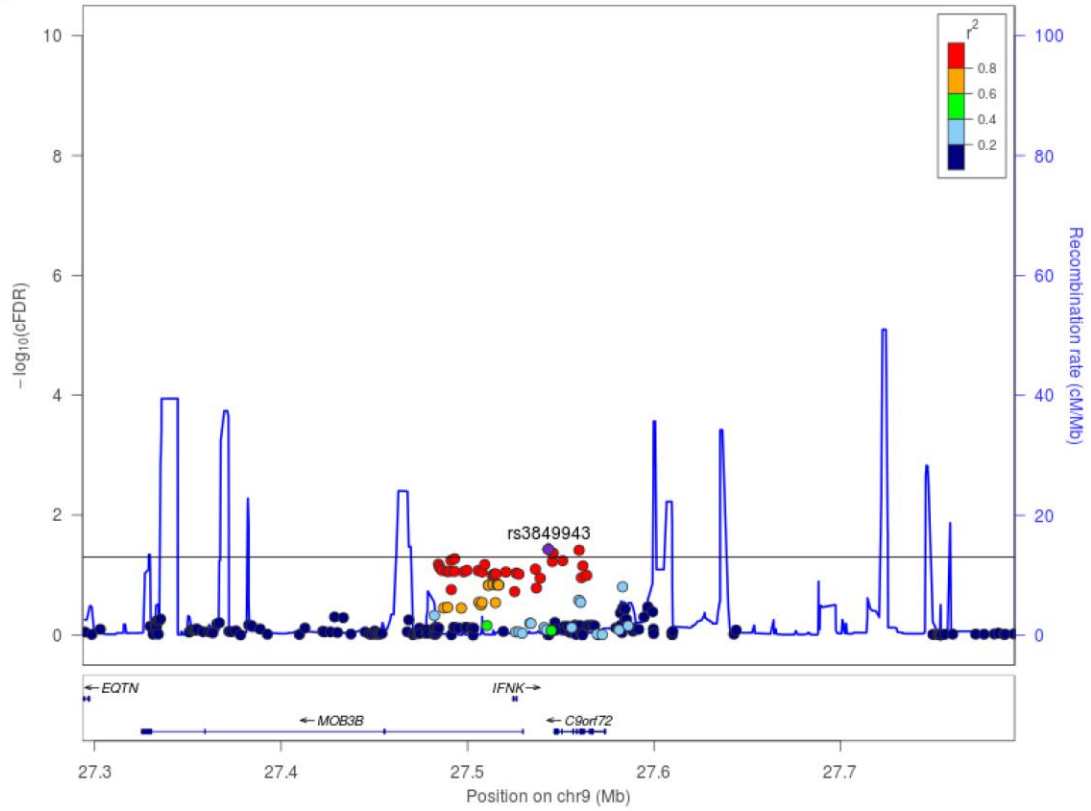**D**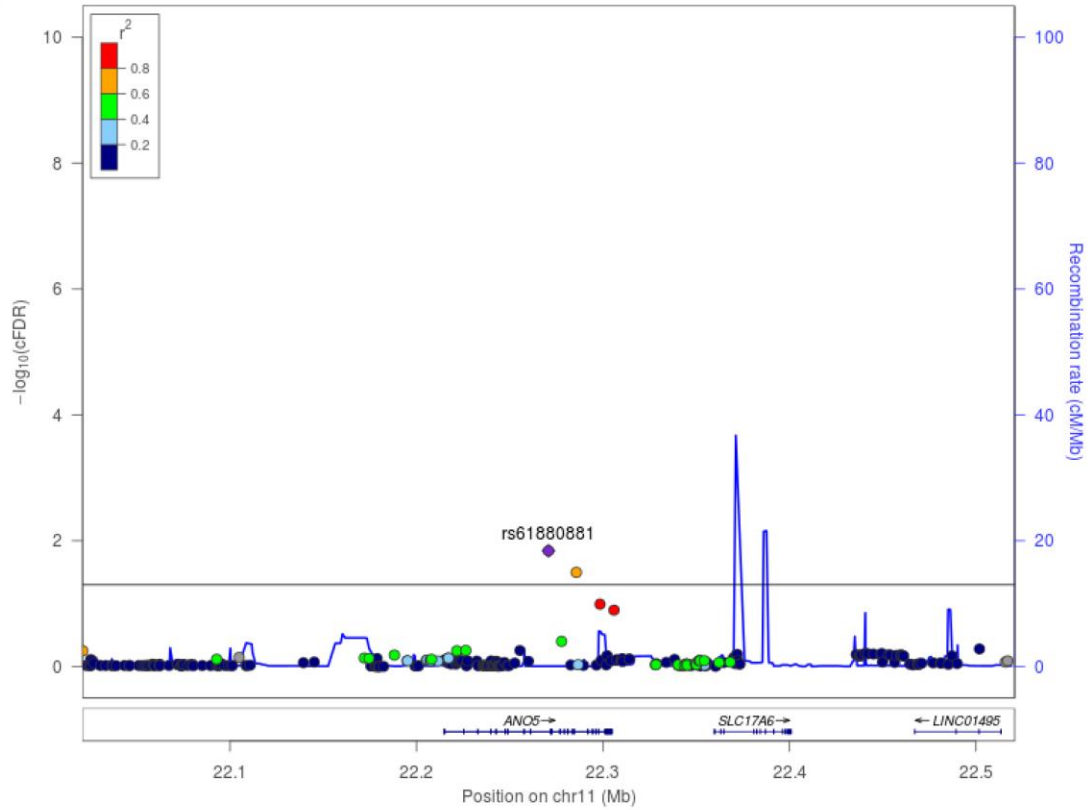

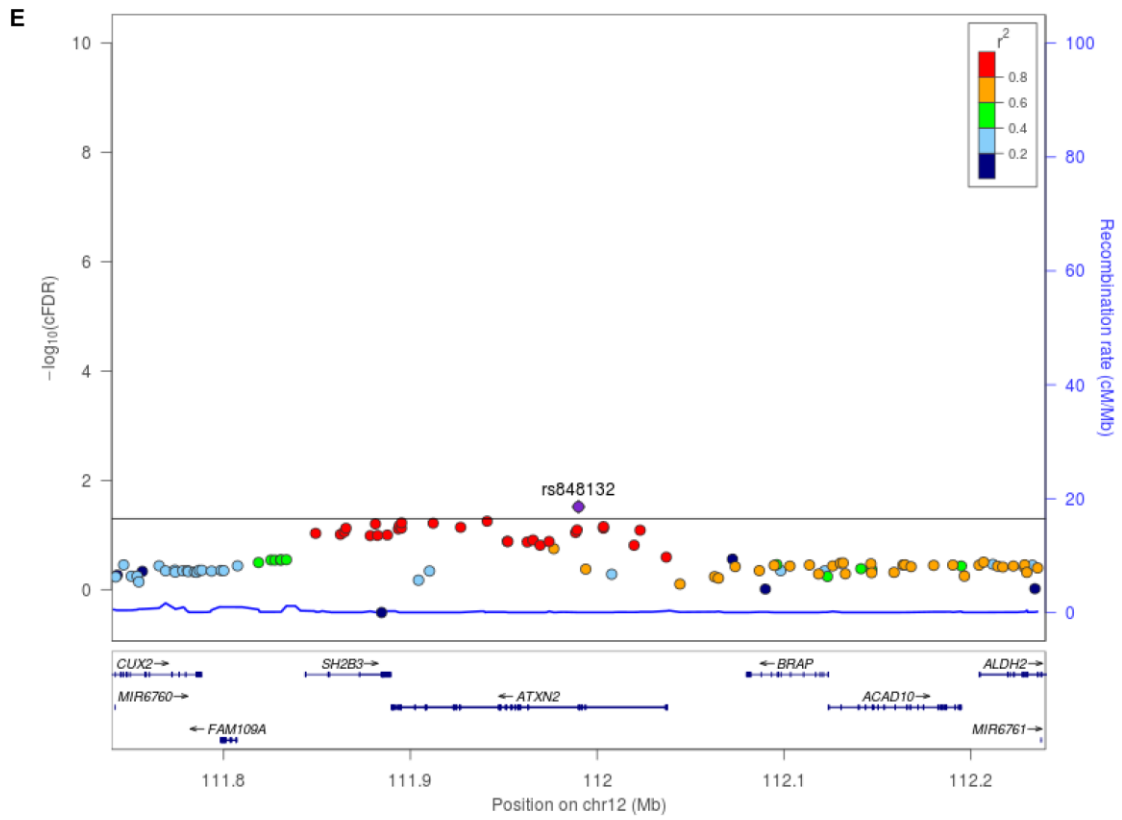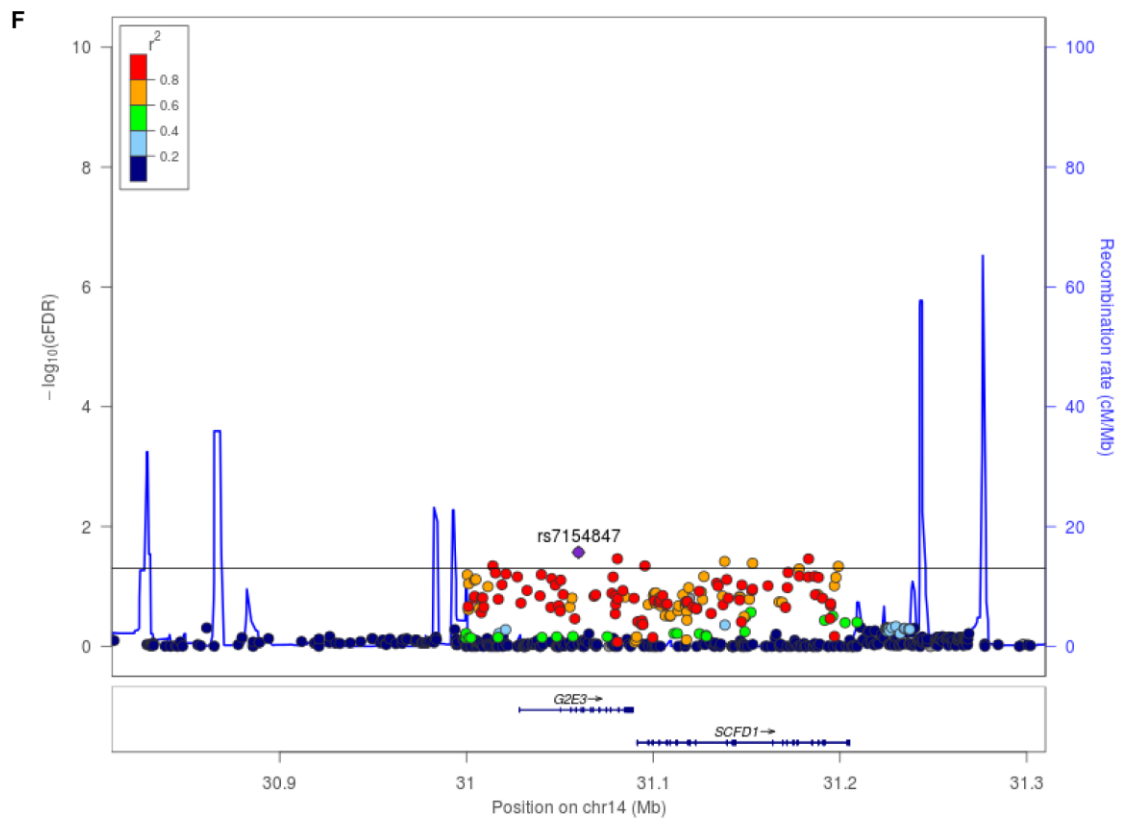

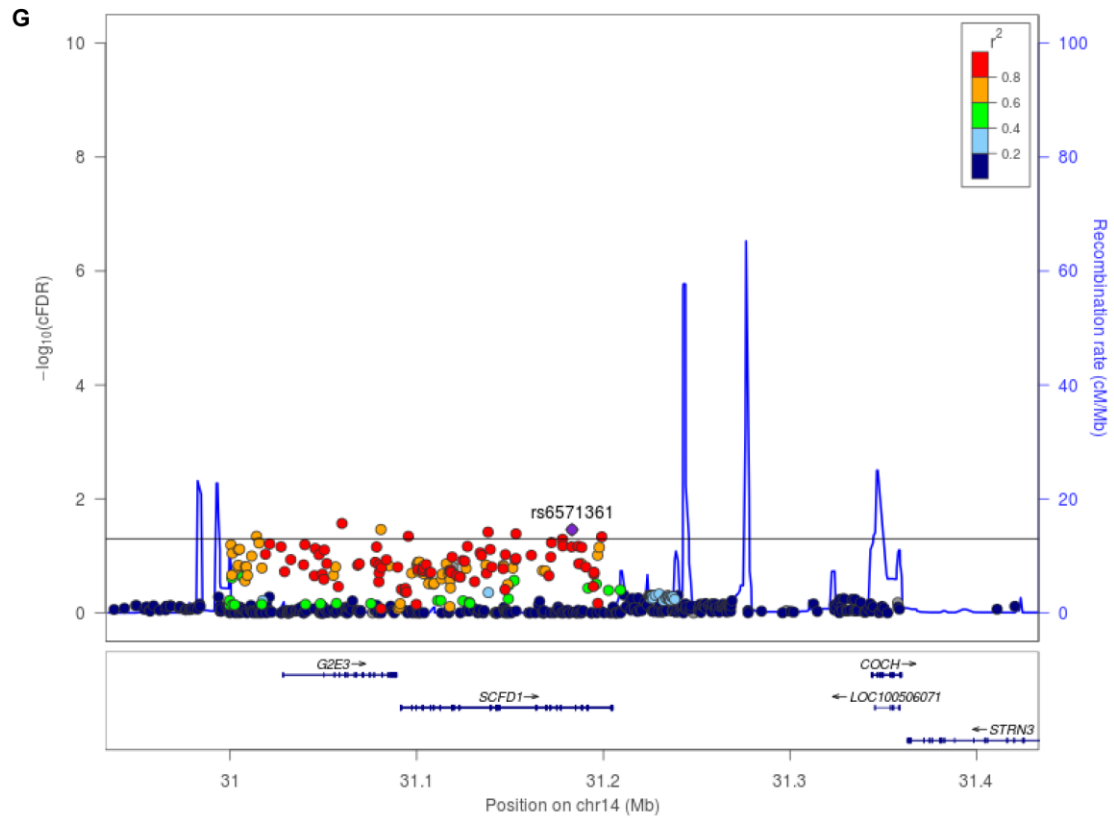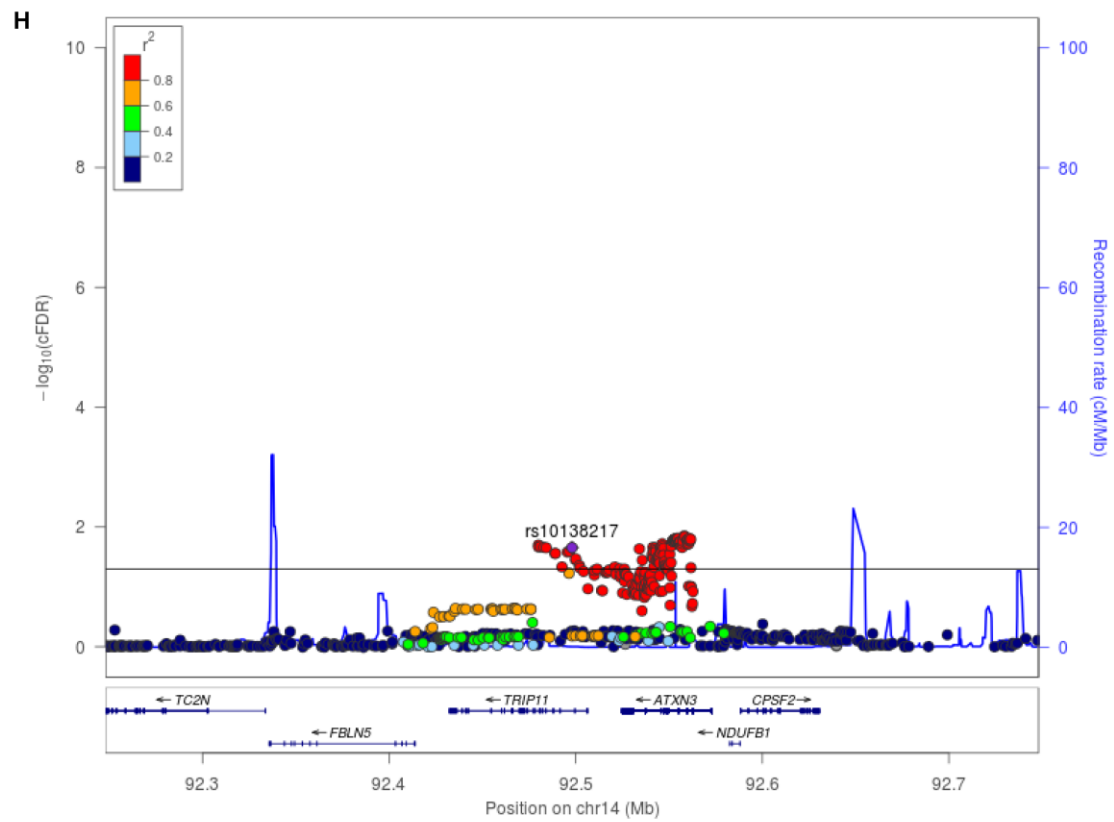



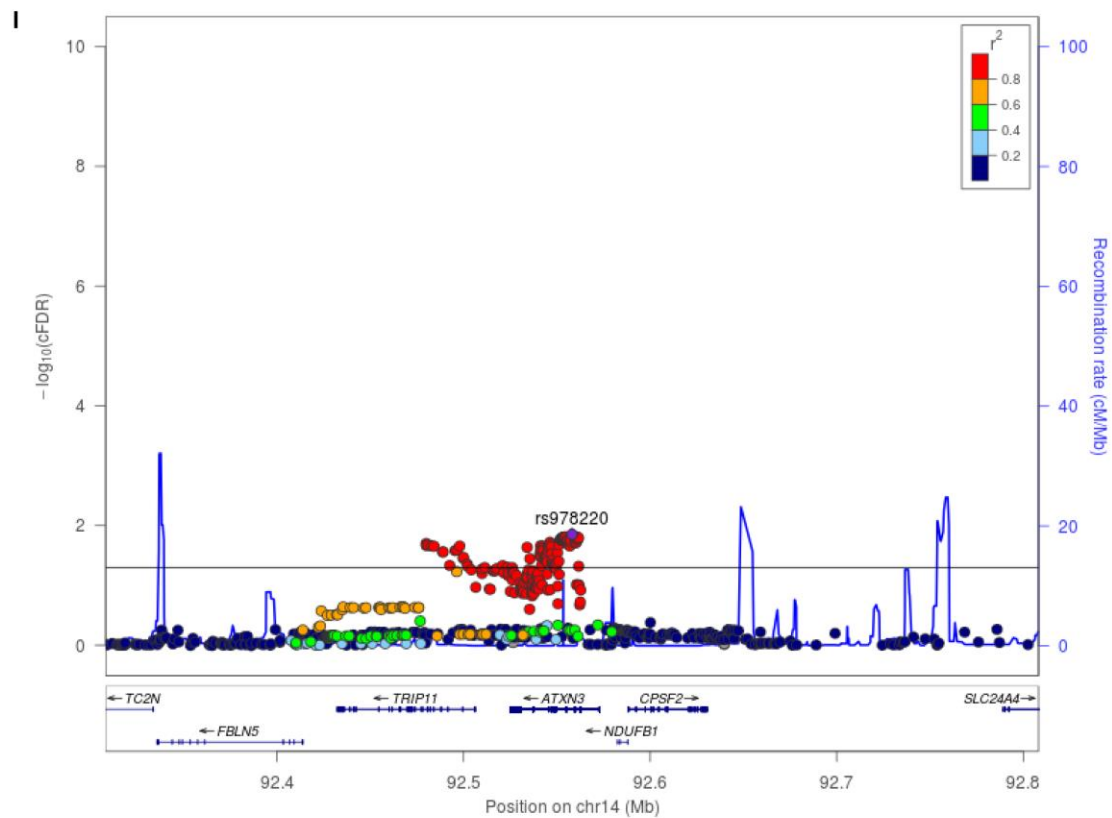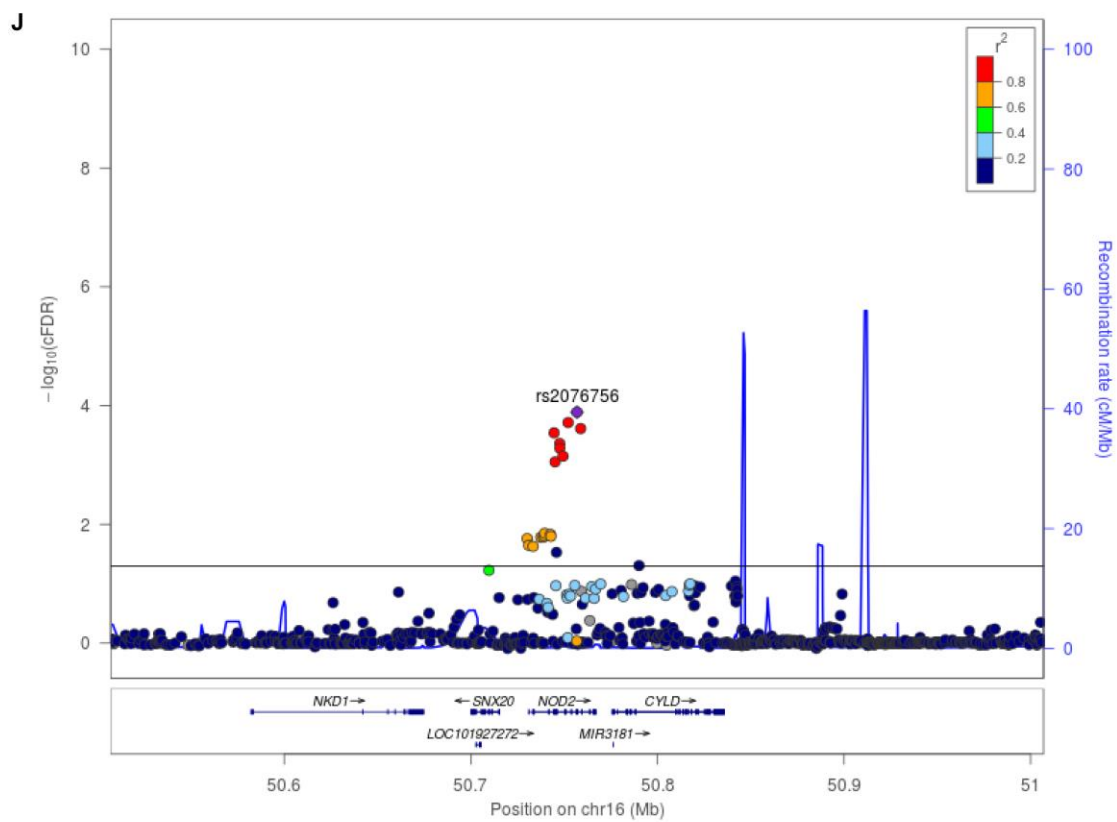

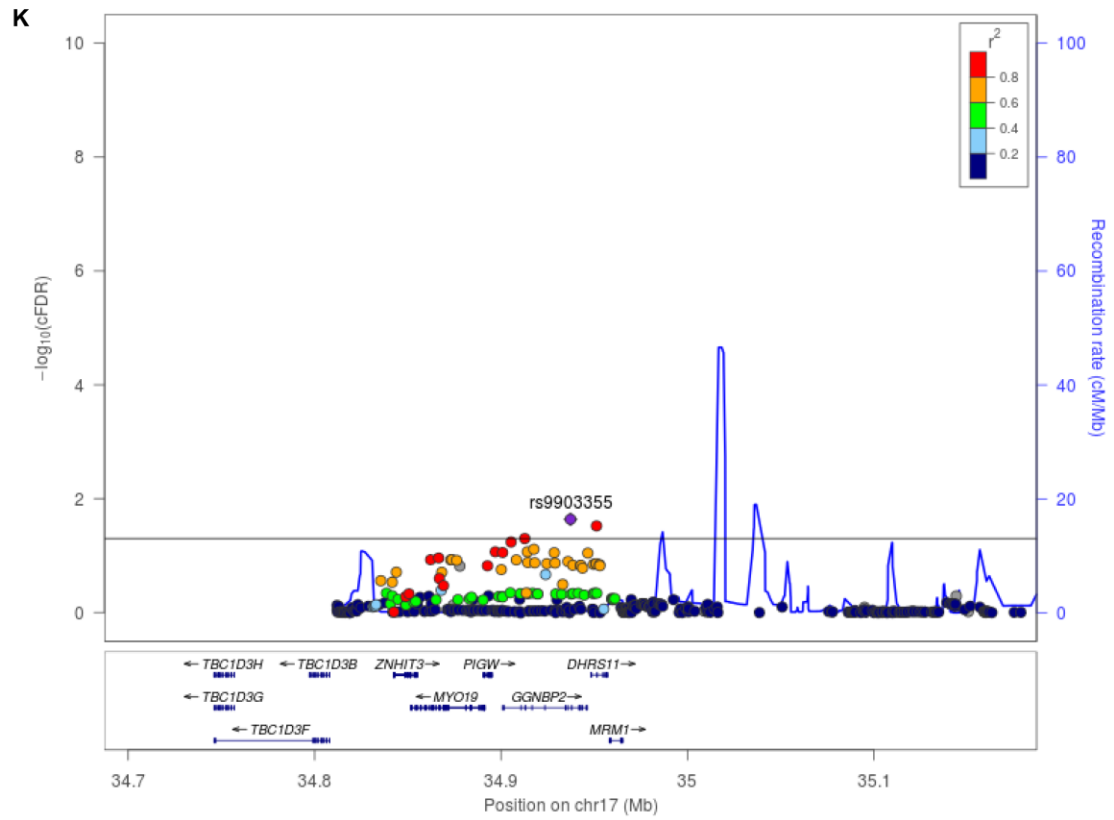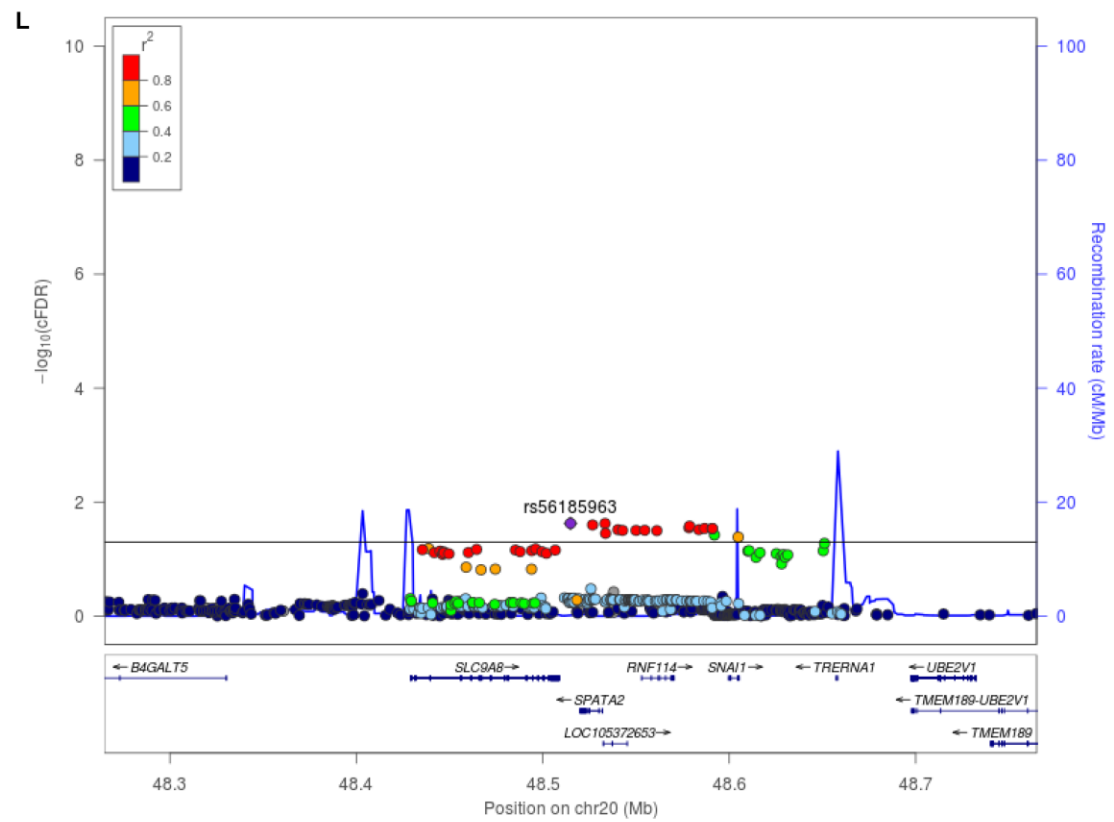

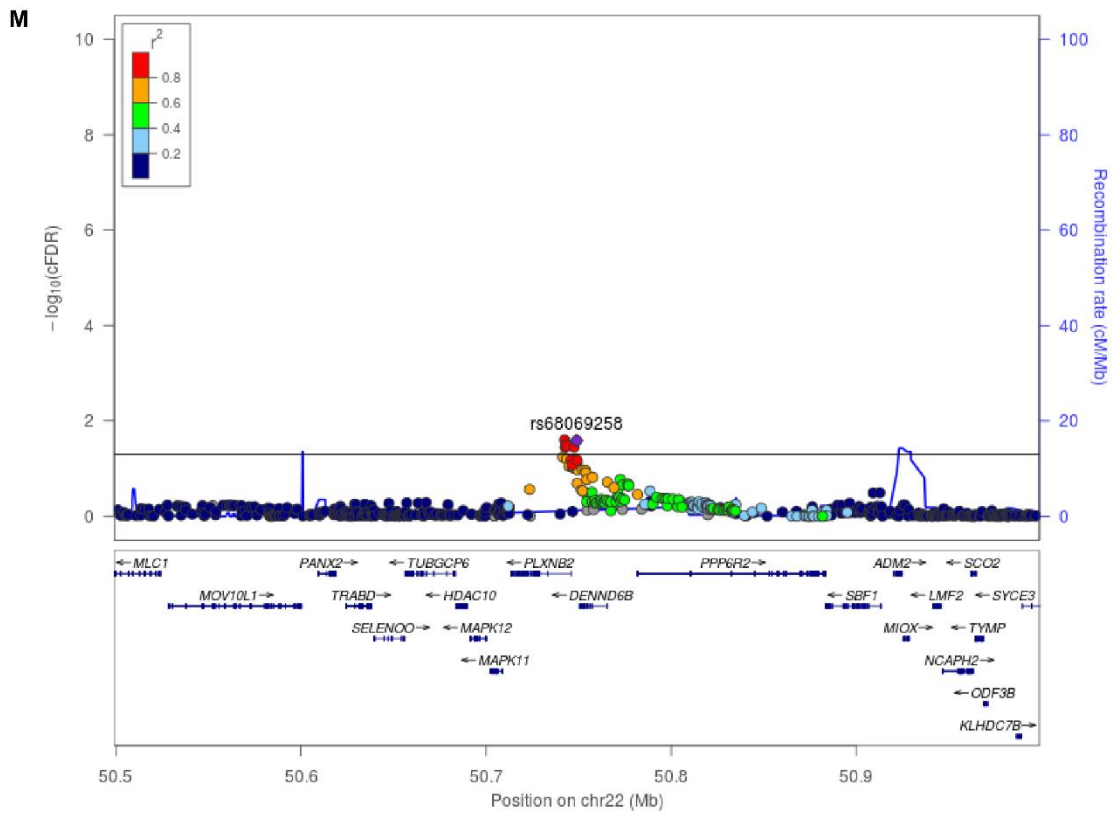

The plots were generated using LocusZoom with default parameters. The horizontal line represents the significant threshold (conditional FDR < 0.05). The linkage disequilibrium was calculated using reference data derived from the 1000 Genomes Project European population. A flanking region of 250kb around target SNP was plotted.
